# Supplementary material
Source: MDPI journal article supplement (https://www.mdpi.com/2077-0472/12/9/1323)
Supplement: s1 [file s1]

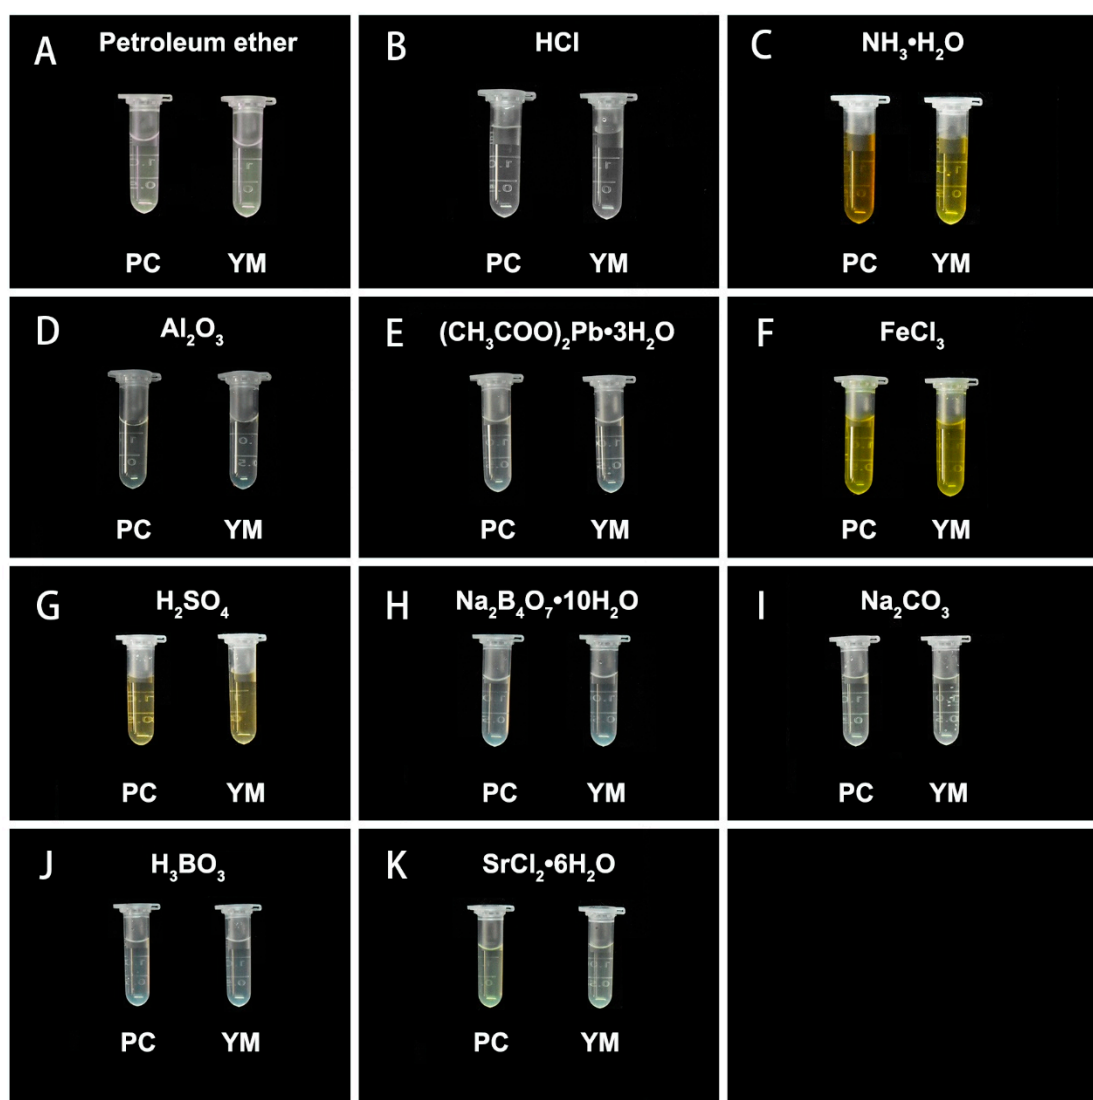

**Supplementary Figure S1.** The color reaction of flavonoids in the ray florets of PC and YM. The experiment of petroleum ether (A) , HCl (B) ,  $\text{NH}_3 \cdot \text{H}_2\text{O}$  (C) ,  $\text{Al}_2\text{O}_3$  (D) ,  $(\text{CH}_3\text{COO})_2\text{Pb} \cdot 3\text{H}_2\text{O}$  (E) ,  $\text{FeCl}_3$  (F) ,  $\text{H}_2\text{SO}_4$  (G) ,  $\text{NaBH}_4$  (H) ,  $\text{Na}_2\text{CO}_3$  (I) ,  $\text{H}_3\text{BO}_3$  (J) ,  $\text{SrCl}_2 \cdot 6\text{H}_2\text{O}$  (K) in the ray florets of PC and YM.

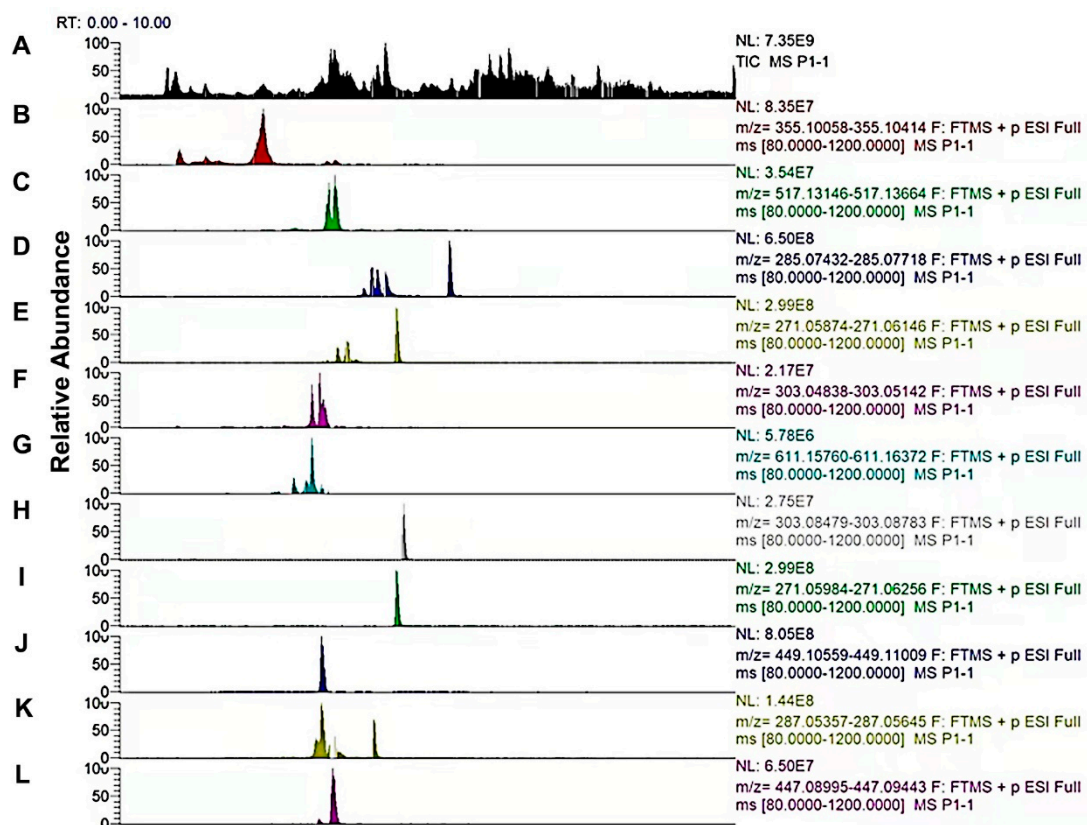

**Supplementary Figure S2.** The HPLC chromatograms of the standards in the ray florets of PC and YM(A). The relative abundance of chlorogenic acid (B), isochlorogenic acid (C), acacetin (D), apigenin (E), quercetin (F), rutin (G), hesperetin (H), naringenin (I), galuteolin (J), luteolin (K) and baicalin (L) in ray florets of PC and YM.

**Supplemental Table S1.** Primers used in this study.

| Primer name    | Primer sequence             |
|----------------|-----------------------------|
| CmPSY(qPCR)-F  | GGATGAGATTGAAGCTAATGATT     |
| CmPSY(qPCR)-R  | GATGATGCTGGCACAAGTGATTT     |
| CmPDS(qPCR)-F  | TTTCATTTGGACGAGCCGATT       |
| CmPDS(qPCR)-R  | GGTCTGGGCGTGGATAGTCG        |
| CmLCYB(qPCR)-F | AGAGCTTGTACCCGAAATCA        |
| CmLCYB(qPCR)-R | CTACAGCTAAACCCGAAGGA        |
| CmLCYE(qPCR)-F | GGAGCGGCTTCGGGTAAACTTCTGCAA |
| CmLCYE(qPCR)-R | CTCTCTTGAAGCCAGACAGGTTTCCTC |
| CmECH(qPCR)-F  | CTGGAGCATTGGCGTTTT          |
| CmECH(qPCR)-R  | CAAGAGCAGCCAGAAGCAC         |
| CmCCD4(qPCR)-F | ACAGGATCATACAGTTGCTAGTCGG   |
| CmCCD4(qPCR)-R | GCACATAAGACACCACATACCC      |
| CmNXS(qPCR)-F  | CCCAGAAAACAAATCAACC         |
| CmNXS(qPCR)-R  | CAACCCAAGACCCATAAT          |
| CmPAL(qPCR)-F  | GTGGGTGATGGTGATGTGGTC       |
| CmPAL(qPCR)-R  | CAAAGCGATCTGTAACAAGTGC      |
| CmDFR(qPCR)-F  | ACATTGGCGGAGAAAGCAGC        |
| CmDFR(qPCR)-R  | AGACTTGGTGGGAACGAGGG        |
| CmFLS(qPCR)-F  | GAAATGGGGAAGAAAGTGGGTG      |
| CmFLS(qPCR)-R  | ACTCCAACCTCCCGGCACCA        |
| CmANR(qPCR)-F  | CACTCAGACATGGAGGGACG        |
| CmANR(qPCR)-R  | TAGCCAAGGTAGGTGAGTCGG       |
| CmFS(qPCR)-F   | CAGTCTGGCGGTCCATCAGC        |
| CmFS(qPCR)-R   | TAGTGGCAGTAGTAGGATGGG       |
| CmUbi(qPCR)-F  | CTAATGAATGCTTACTGTGACCGAC   |
| CmUbi(qPCR)-R  | AGGCGAATCATCAGTACCAAGTG     |
